# Supplementary material for: Werner clathrate formation with polyaromatic hydrocarbons: comparison of different crystallisation methods
Source: Royal Society of Chemistry journal article supplement (doi:10.1039/c5ce02185e), 2016-01-01
Supplement: c5ce02185e1.pdf [file c5ce02185e1.pdf]

Electronic Supplementary Information

**Werner clathrate formation with polyaromatic hydrocarbons: comparison of different crystallisation methods**

Merrill M. Wicht,<sup>a,b</sup> Hong Su,<sup>a</sup> Nikoletta B. Báthori<sup>\*b</sup> and Luigi R. Nassimbeni<sup>a</sup>

---

<sup>a.</sup> University of Cape Town, Rondebosch, Cape Town, South Africa. Tel: 27 21 6505893;  
Fax: 27 21 650541

<sup>b.</sup> Cape Peninsula University of Technology, Zonnebloem, Cape Town, South Africa. Tel: 27 21 4608354; E-mail: bathorin@cput.ac.za

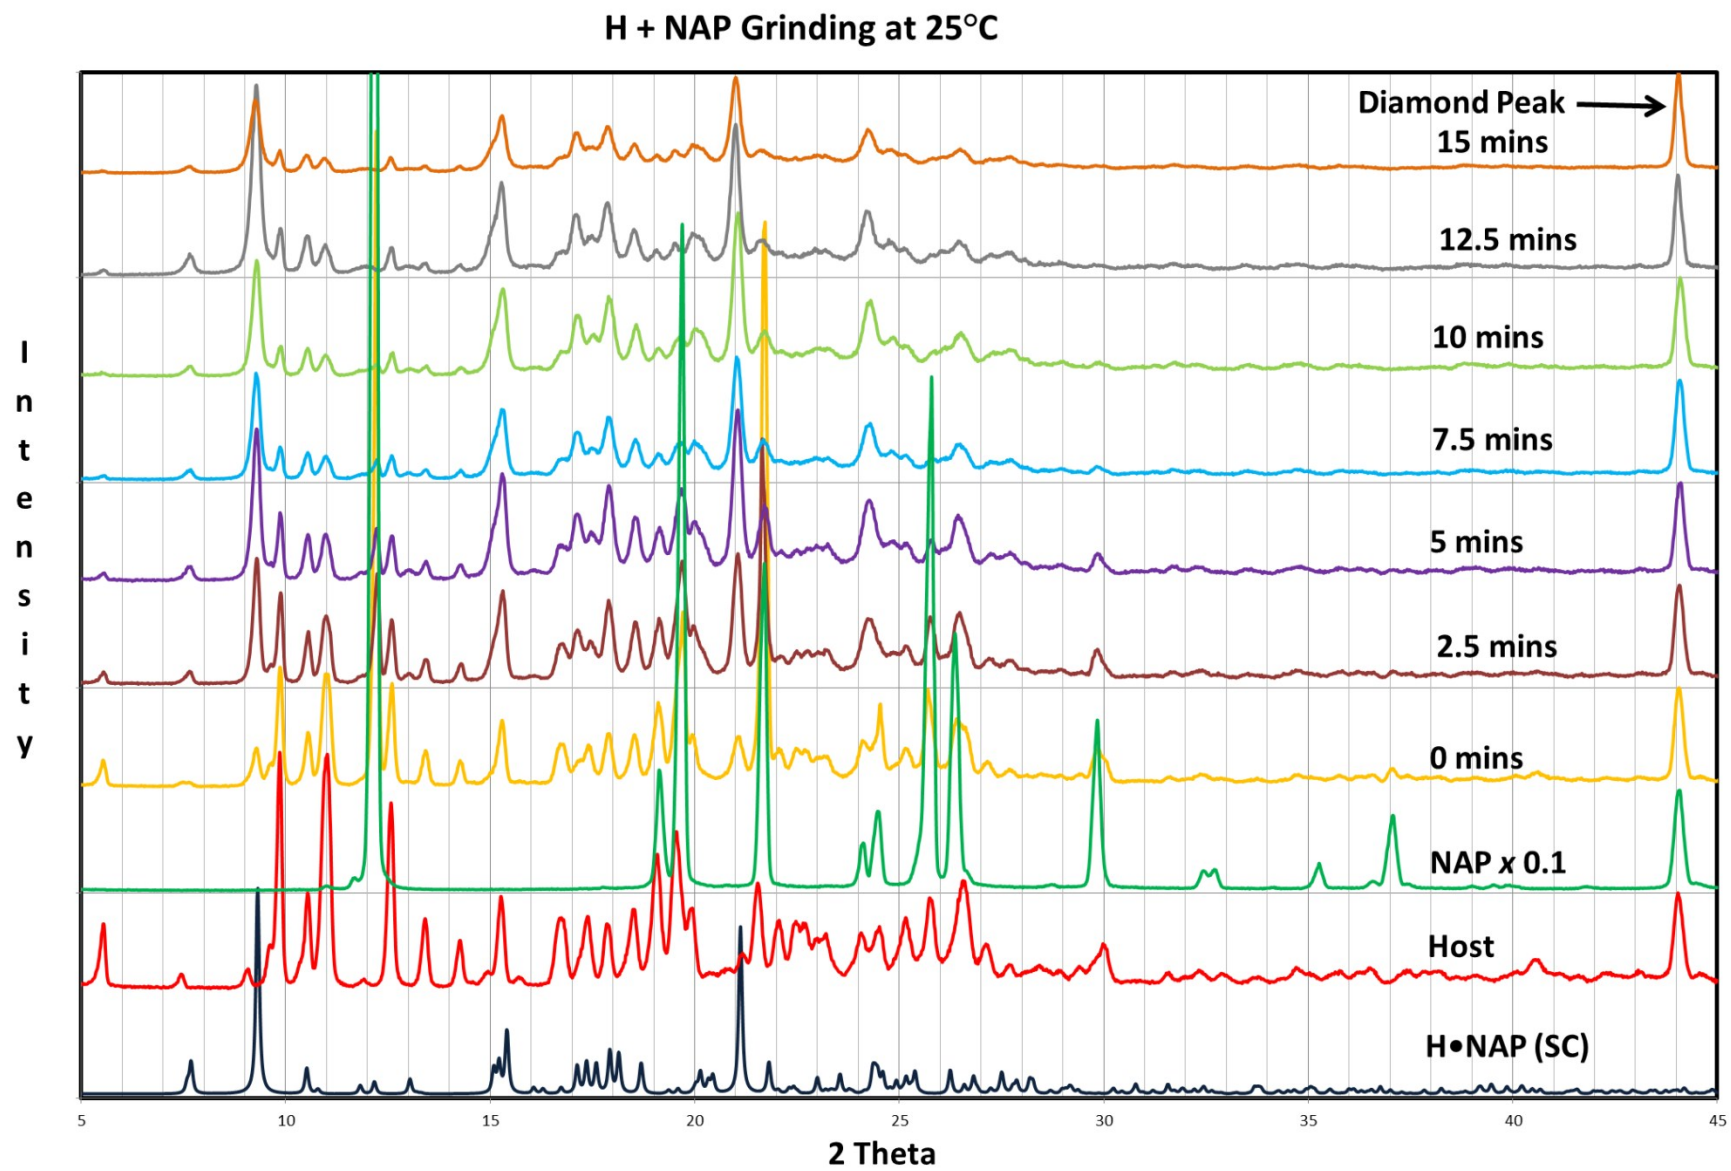

Figure S1: PXRD patterns of **H** grinding with **NAP** at 25°C

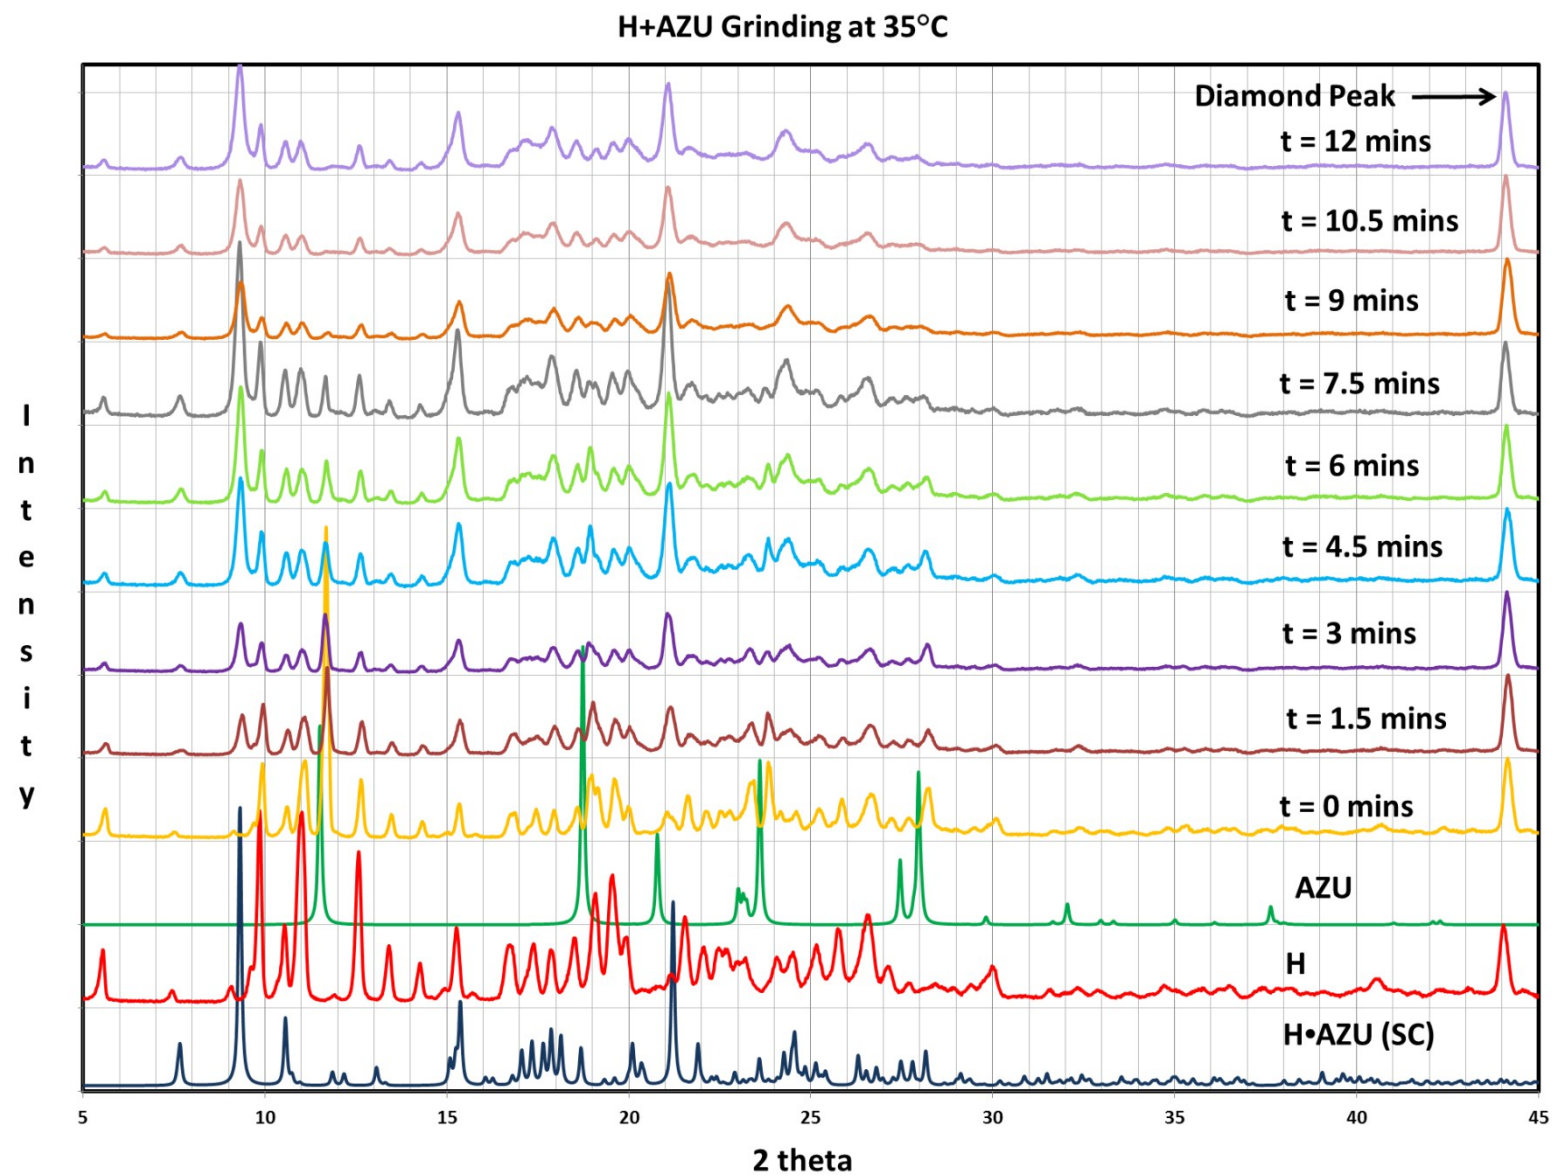

Figure S2: PXRD patterns of **H** grinding with **AZU** at 35°C

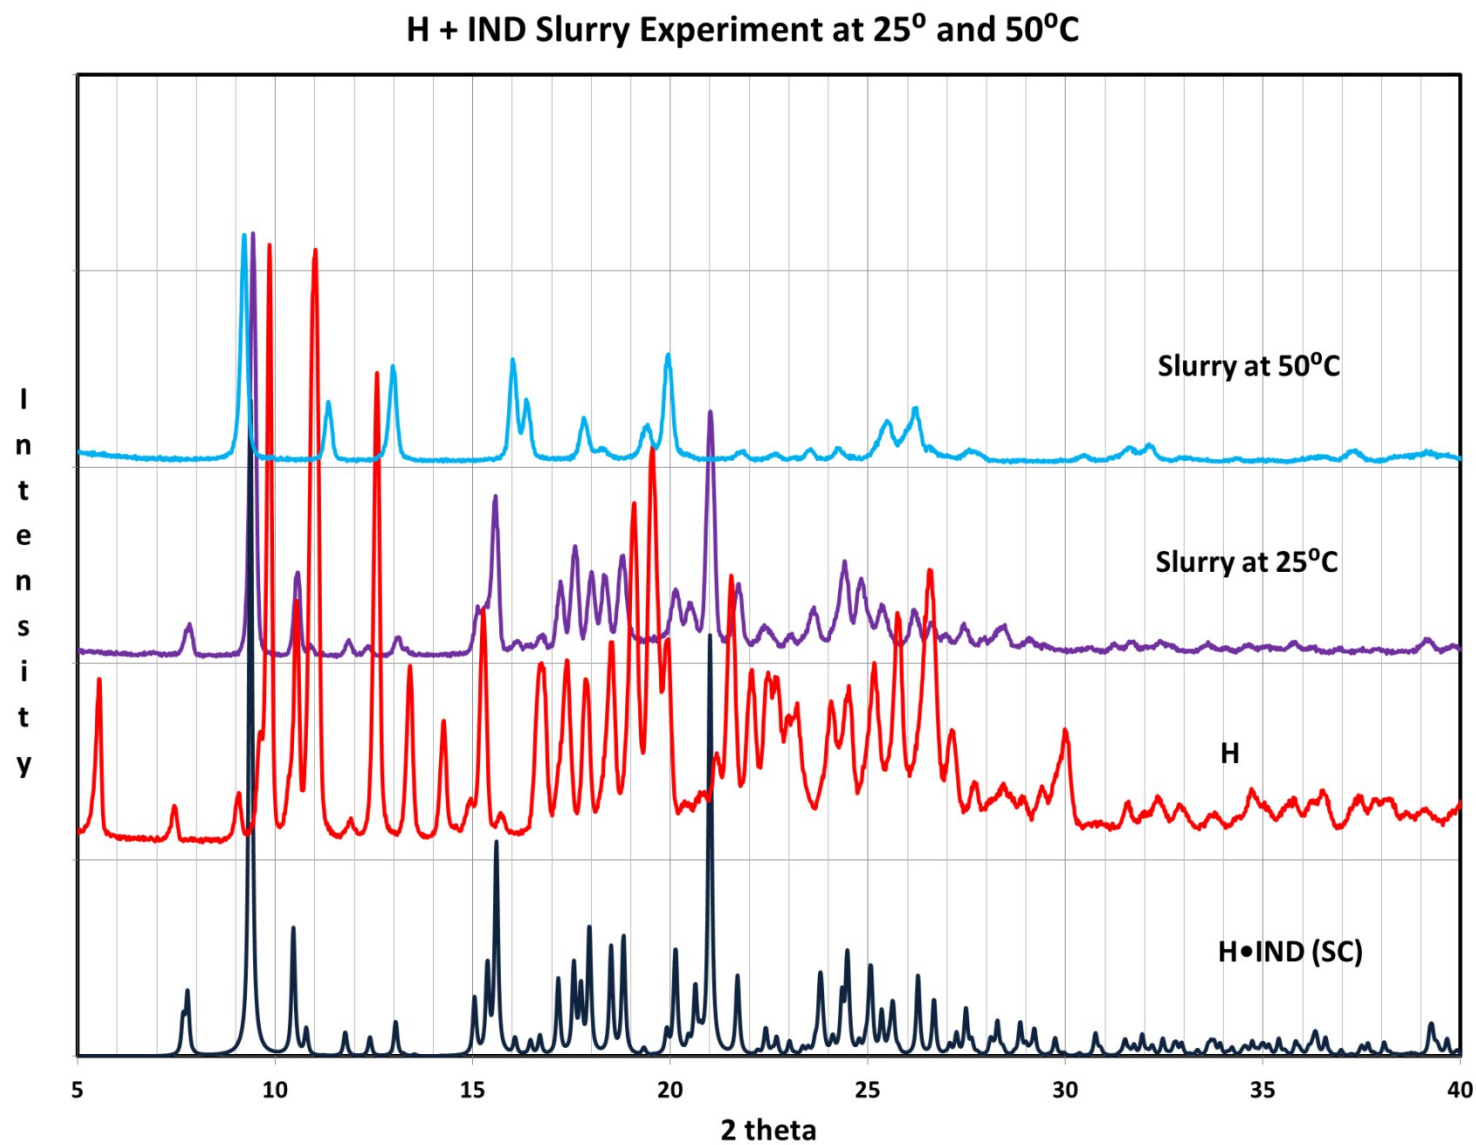

Figure S3: PXRD patterns of **H** and **IND** slurring at 25° and 50°C

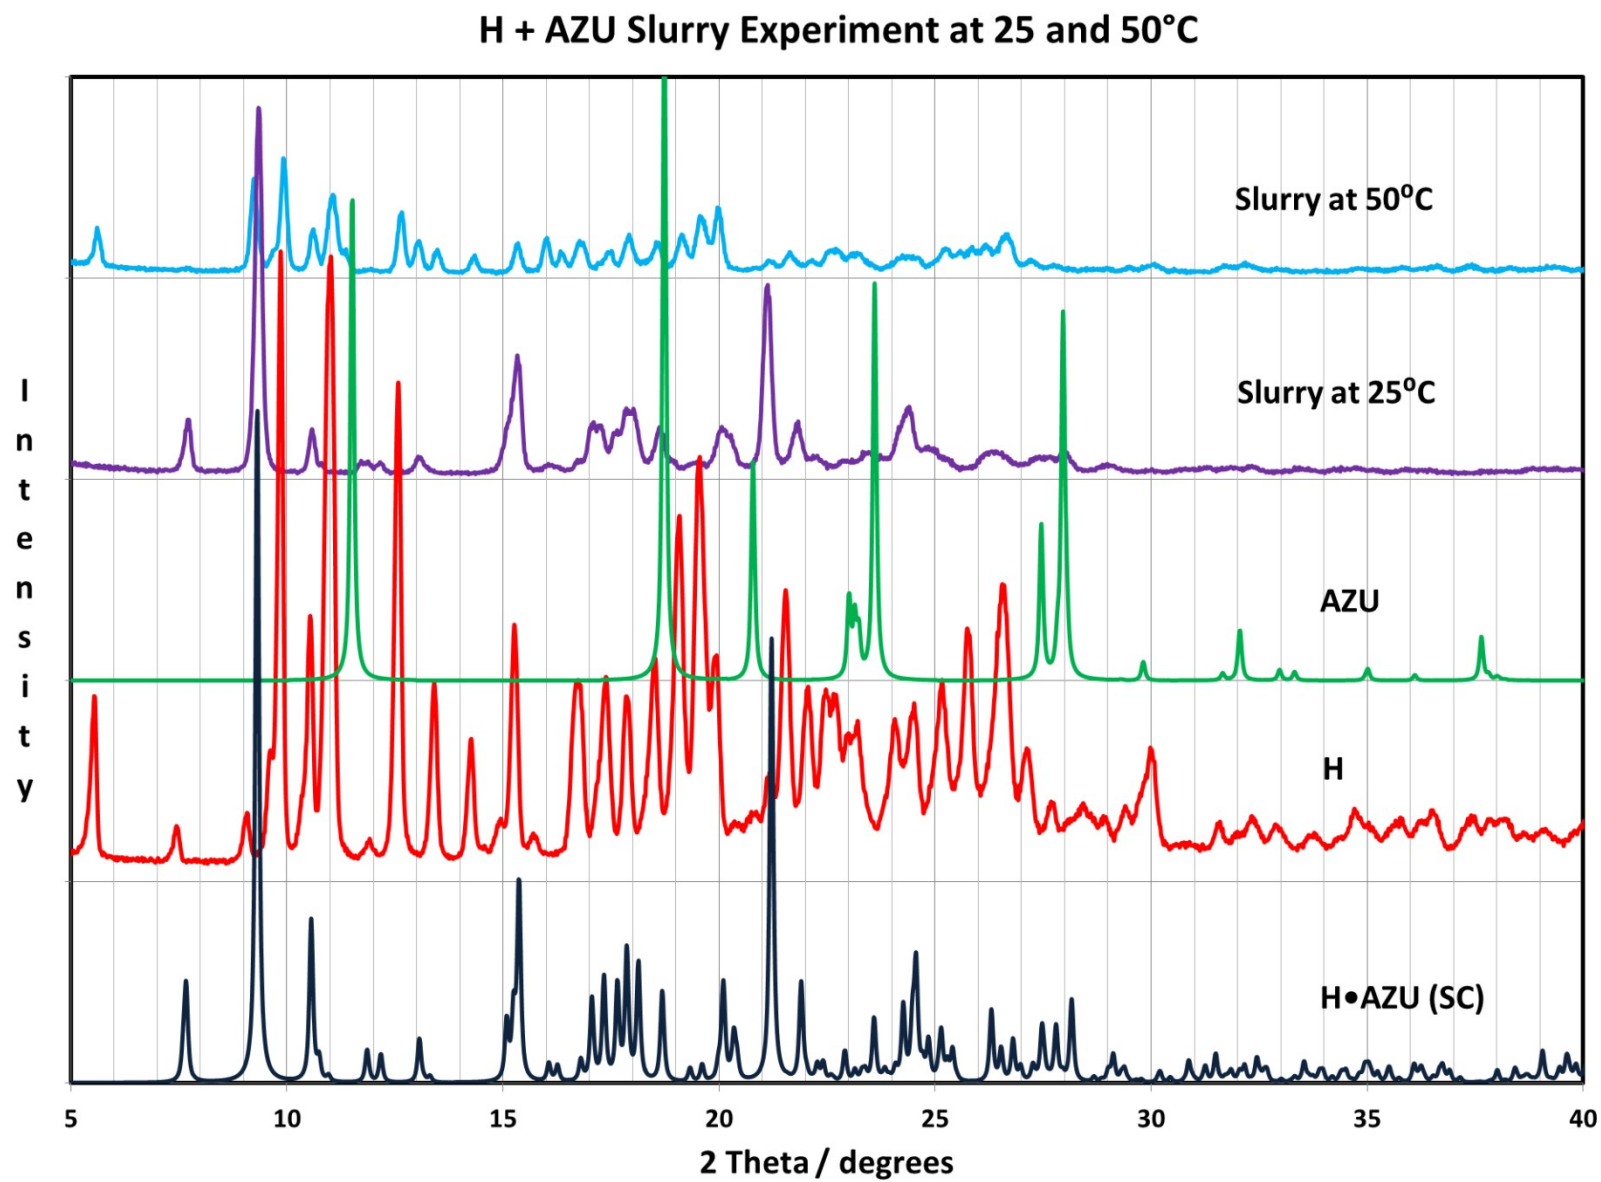

Figure S4: PXRD patterns of **H** and **AZU** with slurring at 25° and 50°C



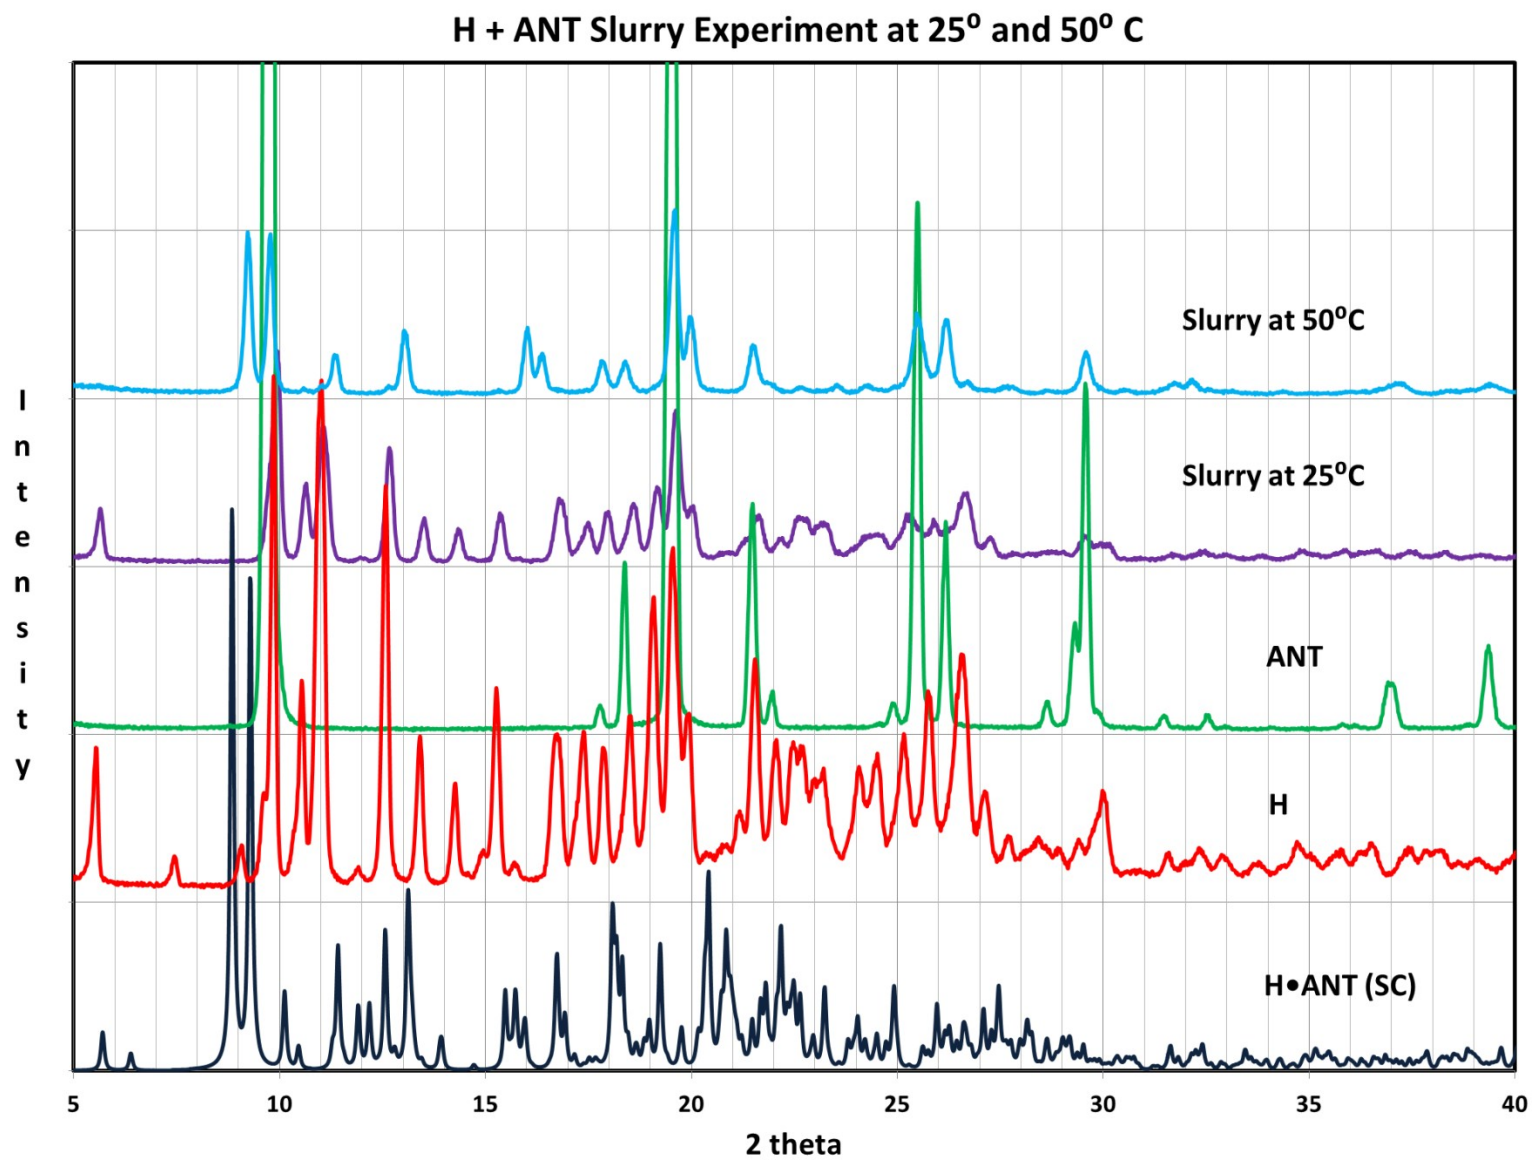

Figure S5: PXRD patterns of H H and ANT with slurring at 25° and 50°C

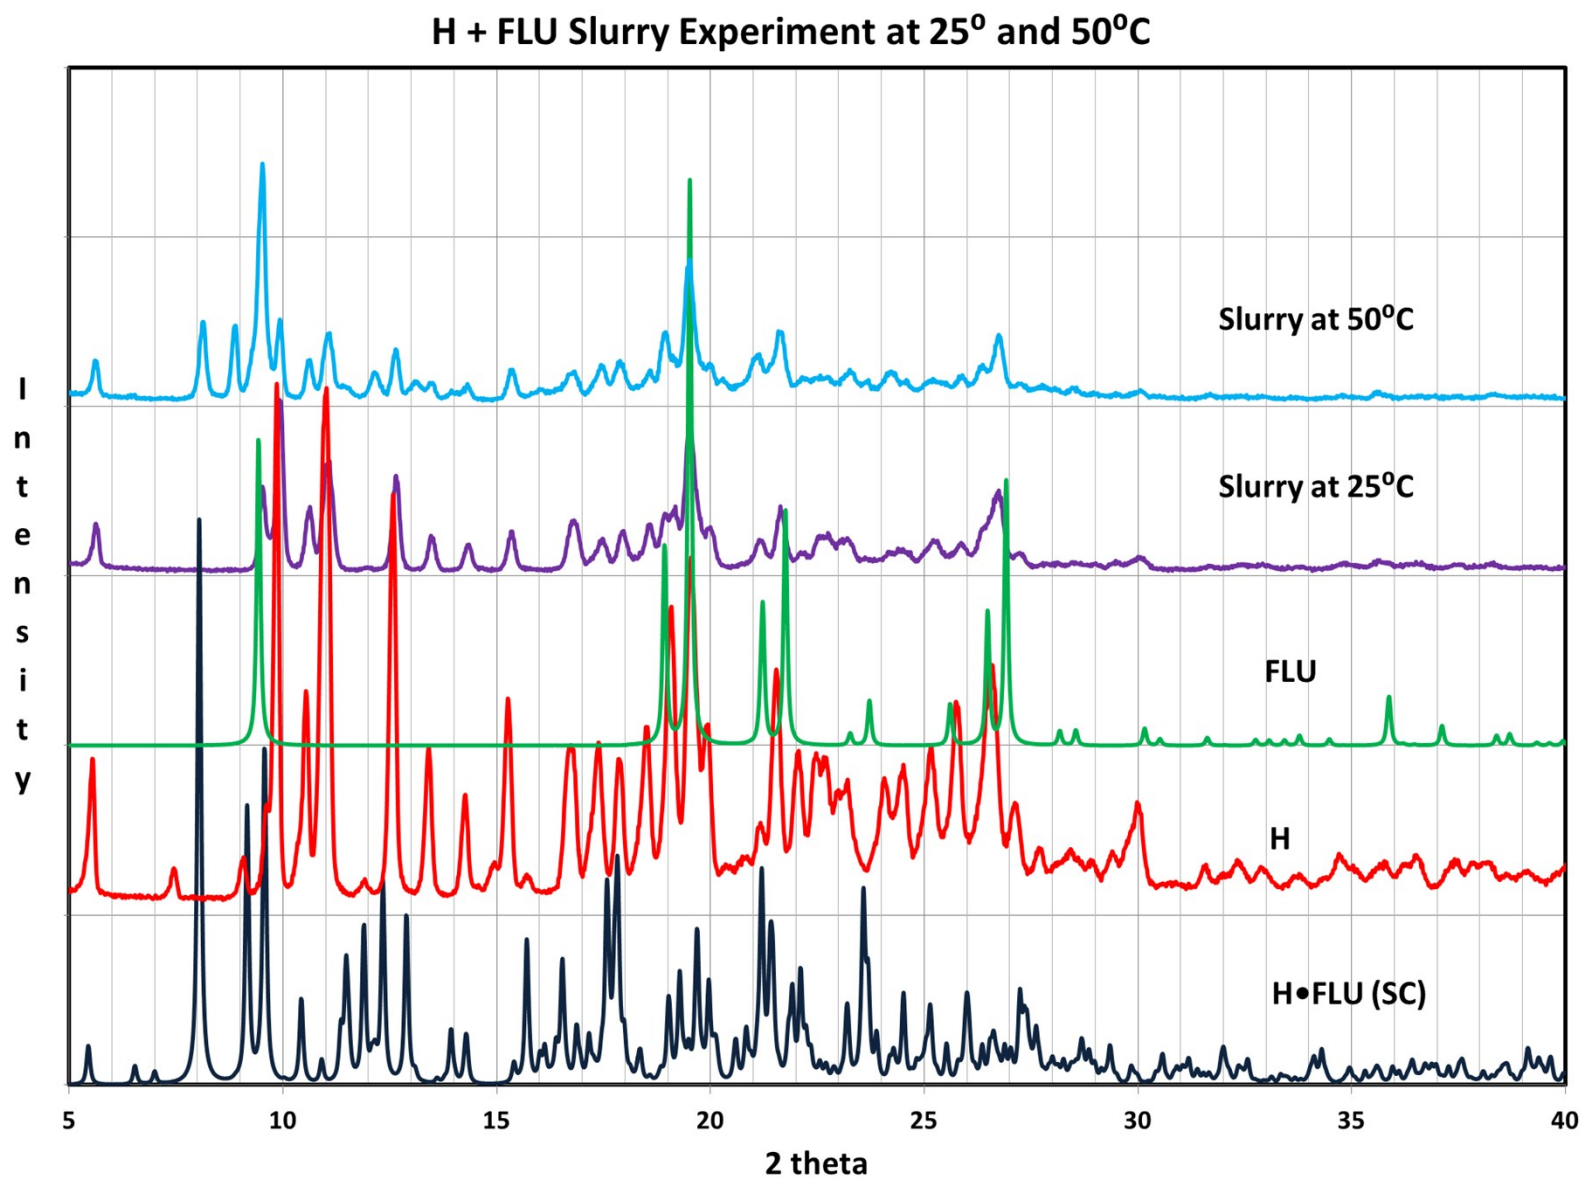

Figure S6: PXRD patterns of **H** and **FLU** with slurring at 25° and 50°C

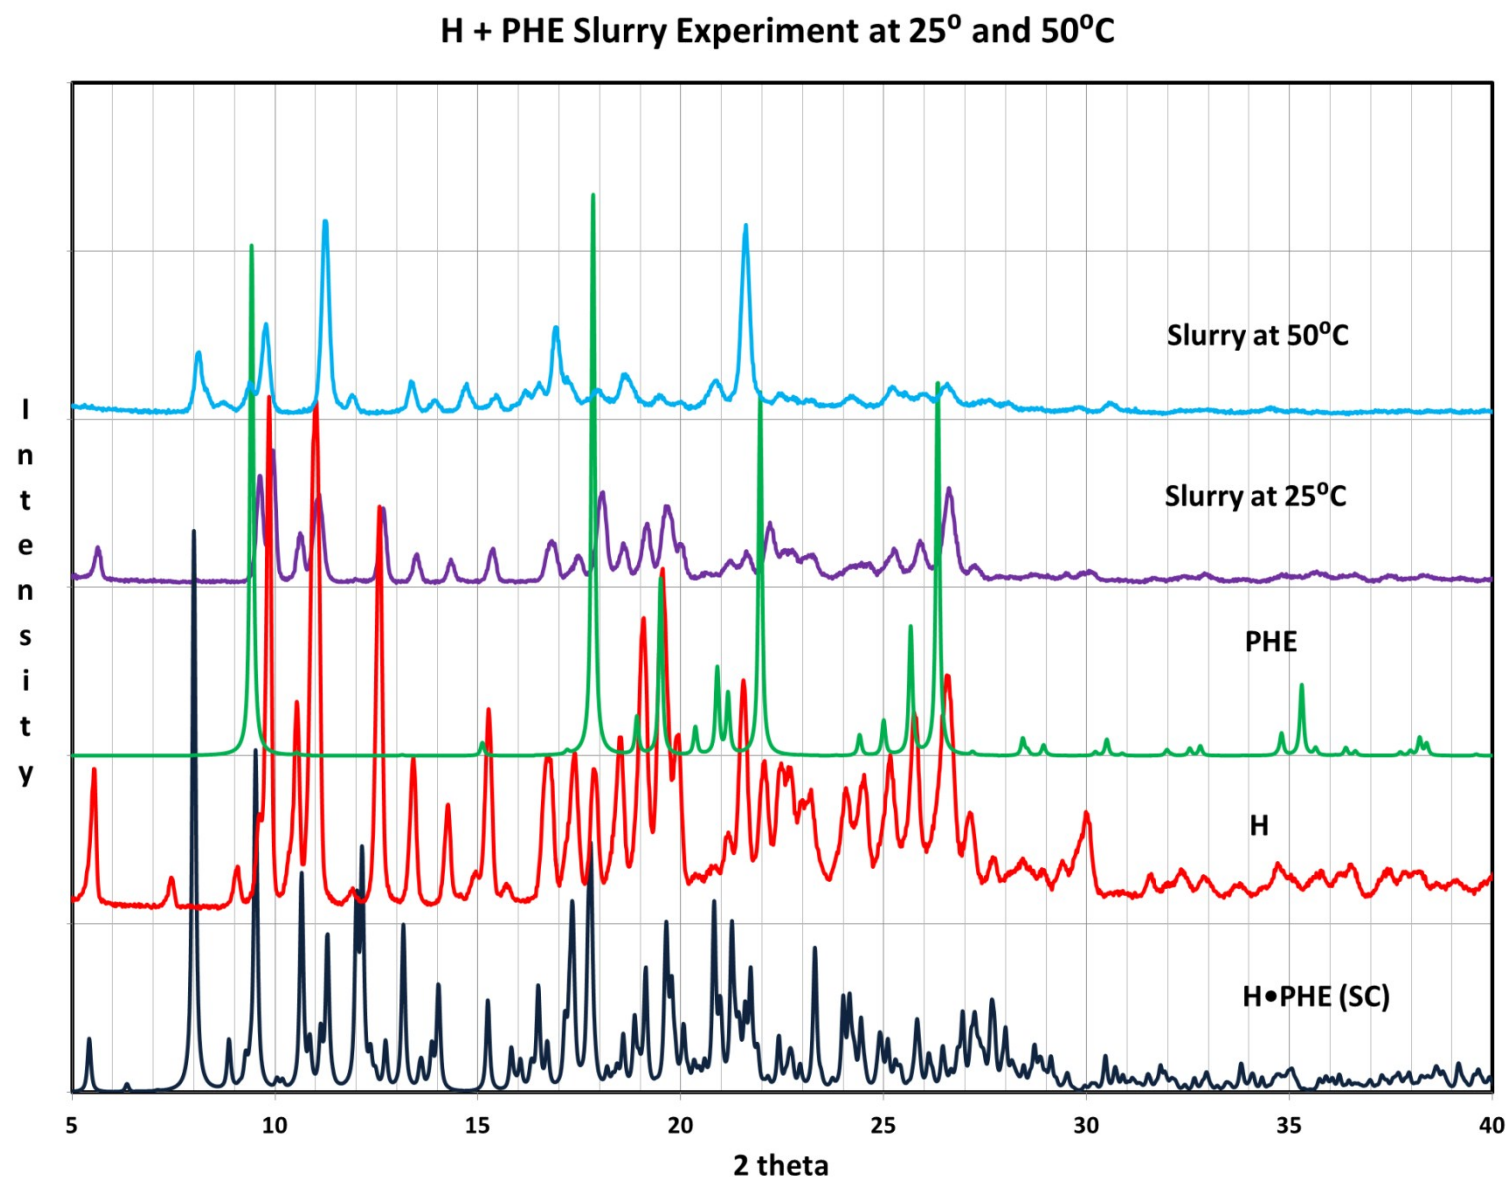

Figure S7: PXRD patterns of **H** and **PHE** with slurring at 25° and 50°C



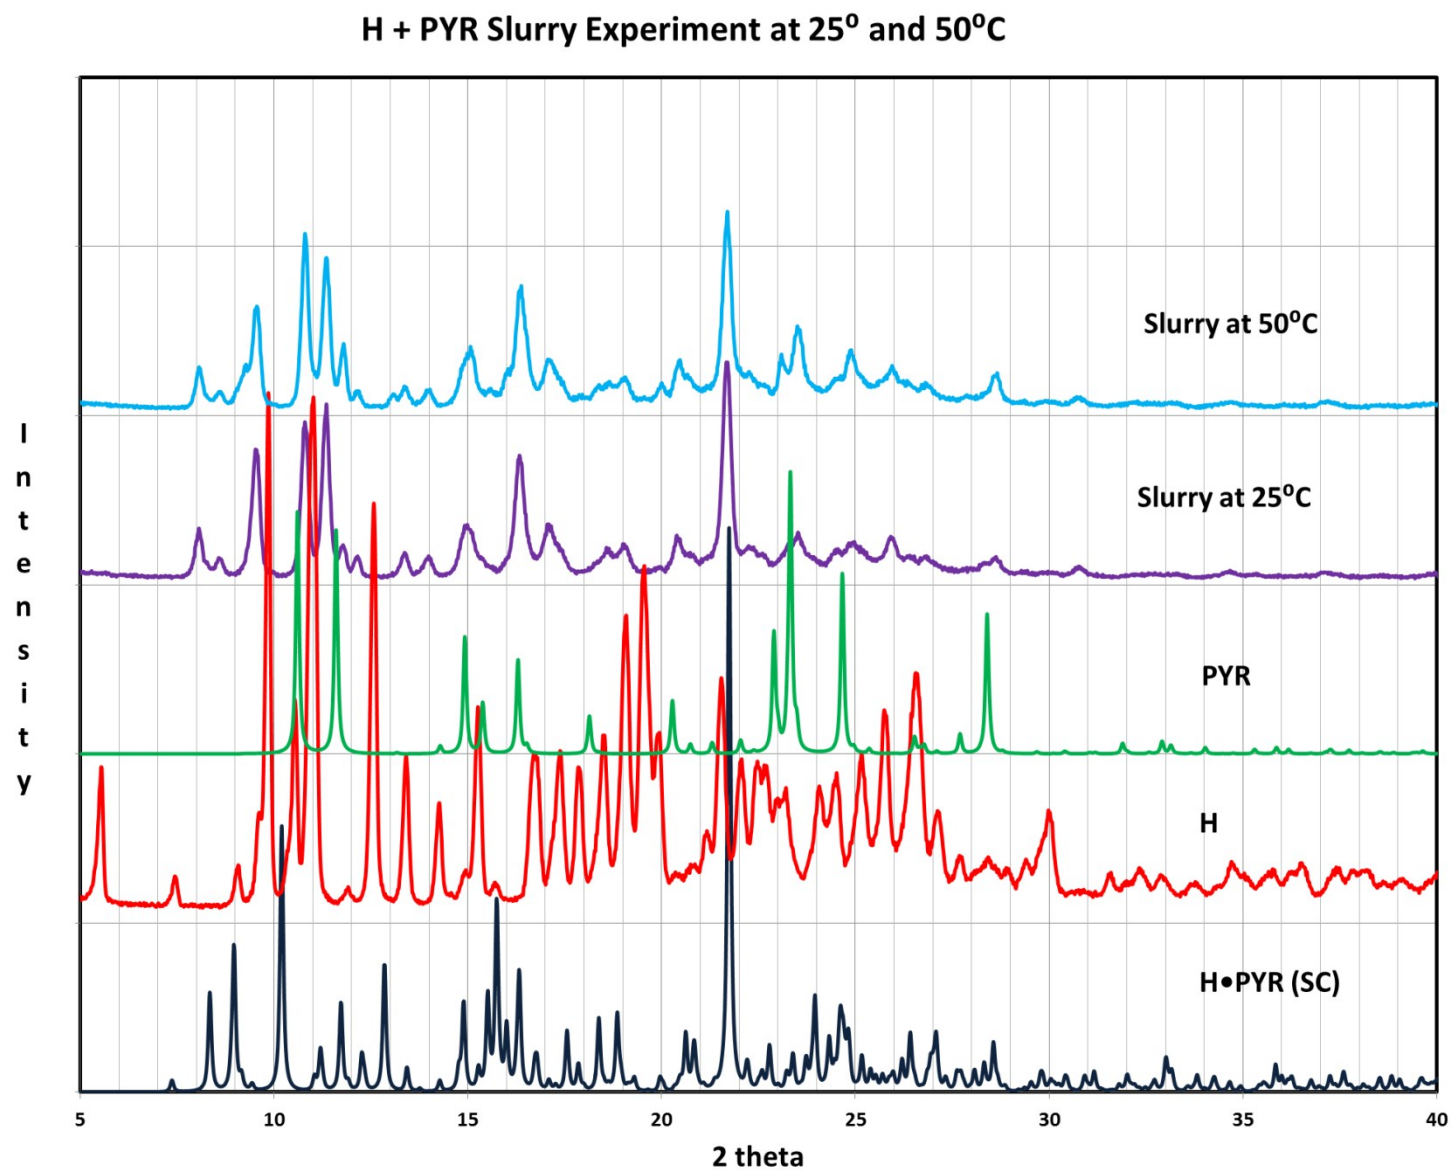

Figure S8: PXRD patterns of **H** and **PYR** with slurring at 25° and 50°C

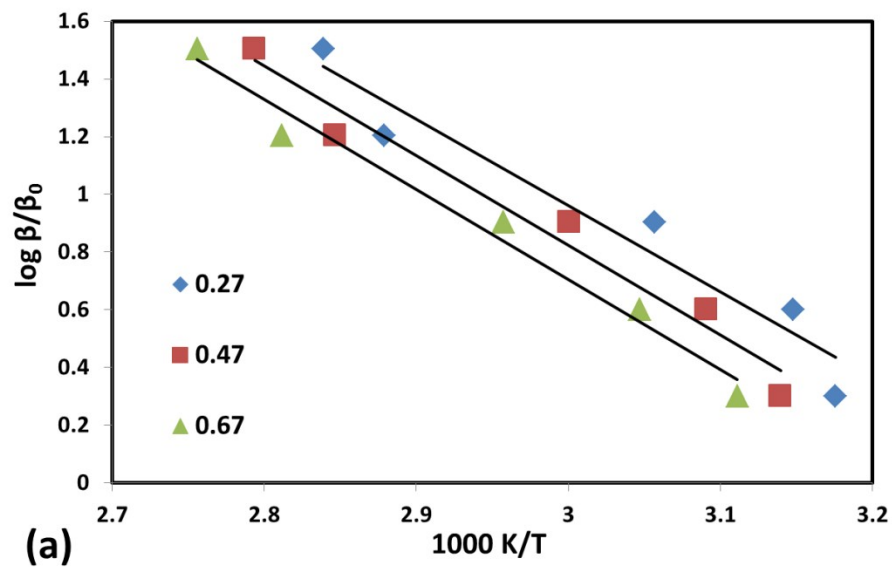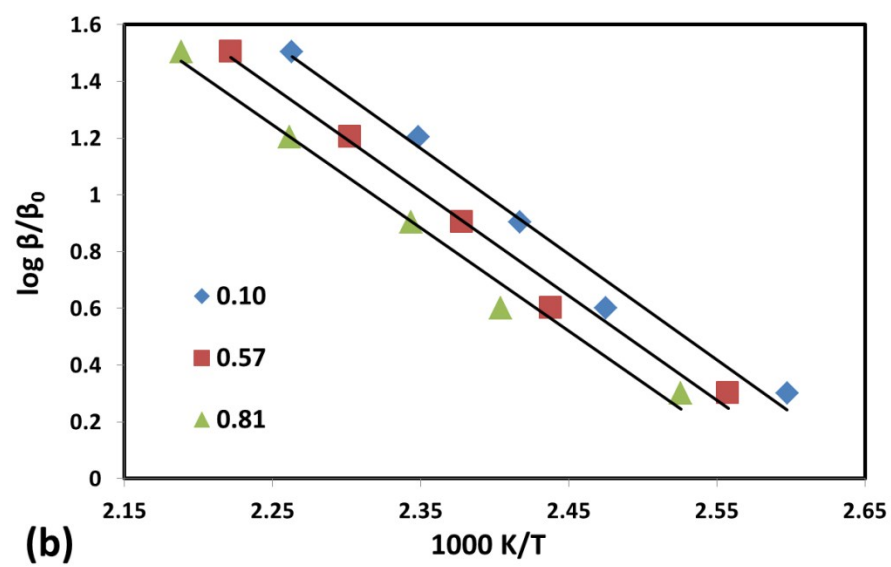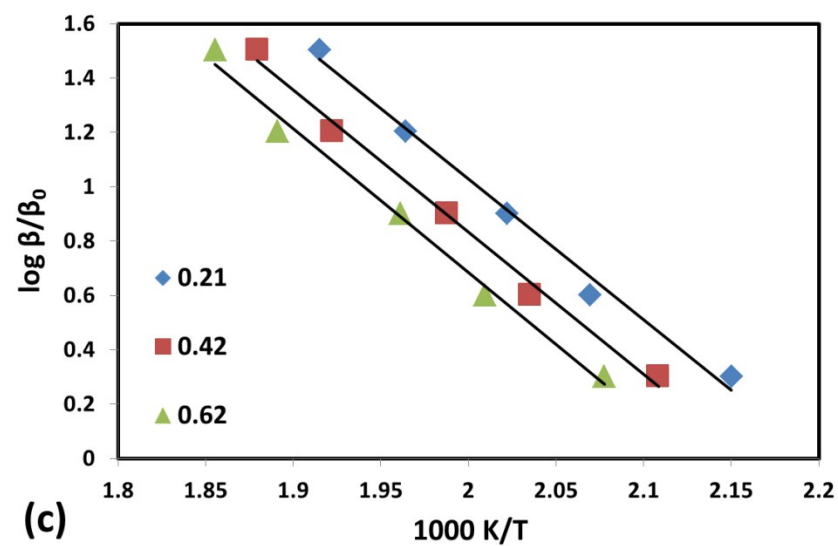

Fig. 7

Figure S9: Activation energies for (a) Stage 1; (b) Stage 2 and (c) Stage 3 for **H•NAP**

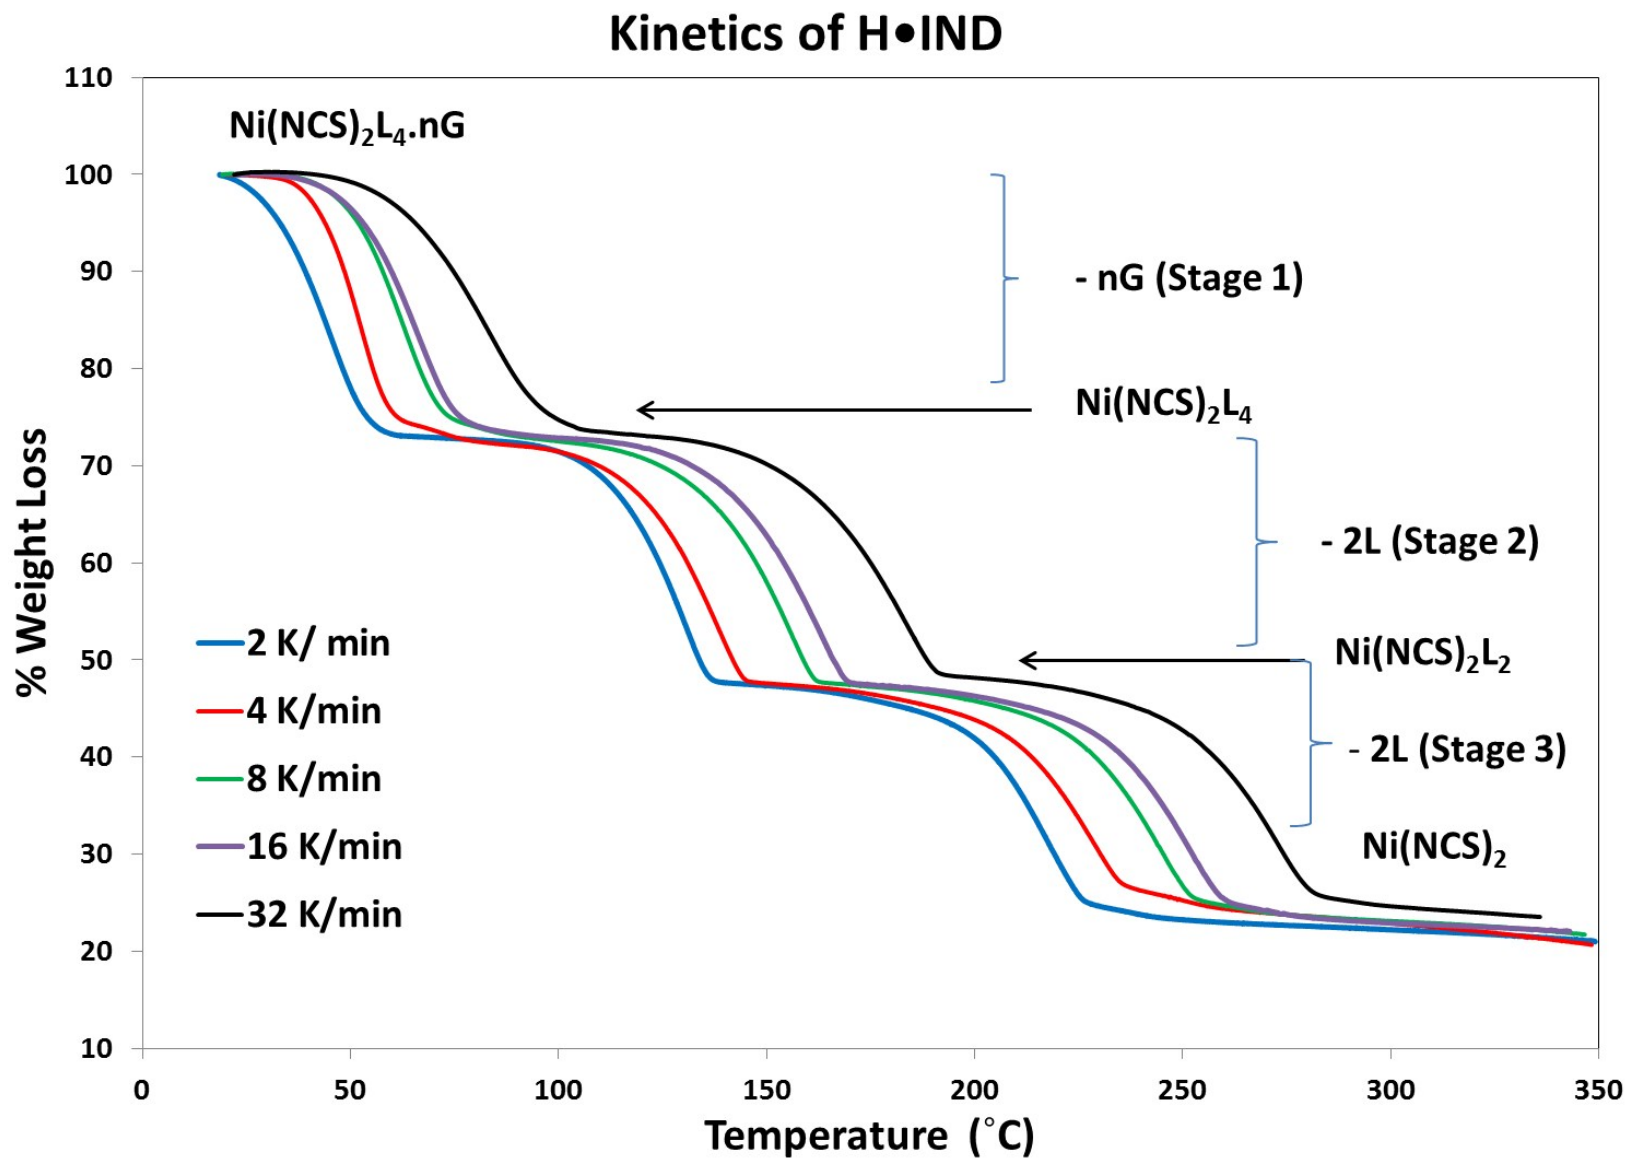

Figure S10: Non-isothermal kinetics of H•IND

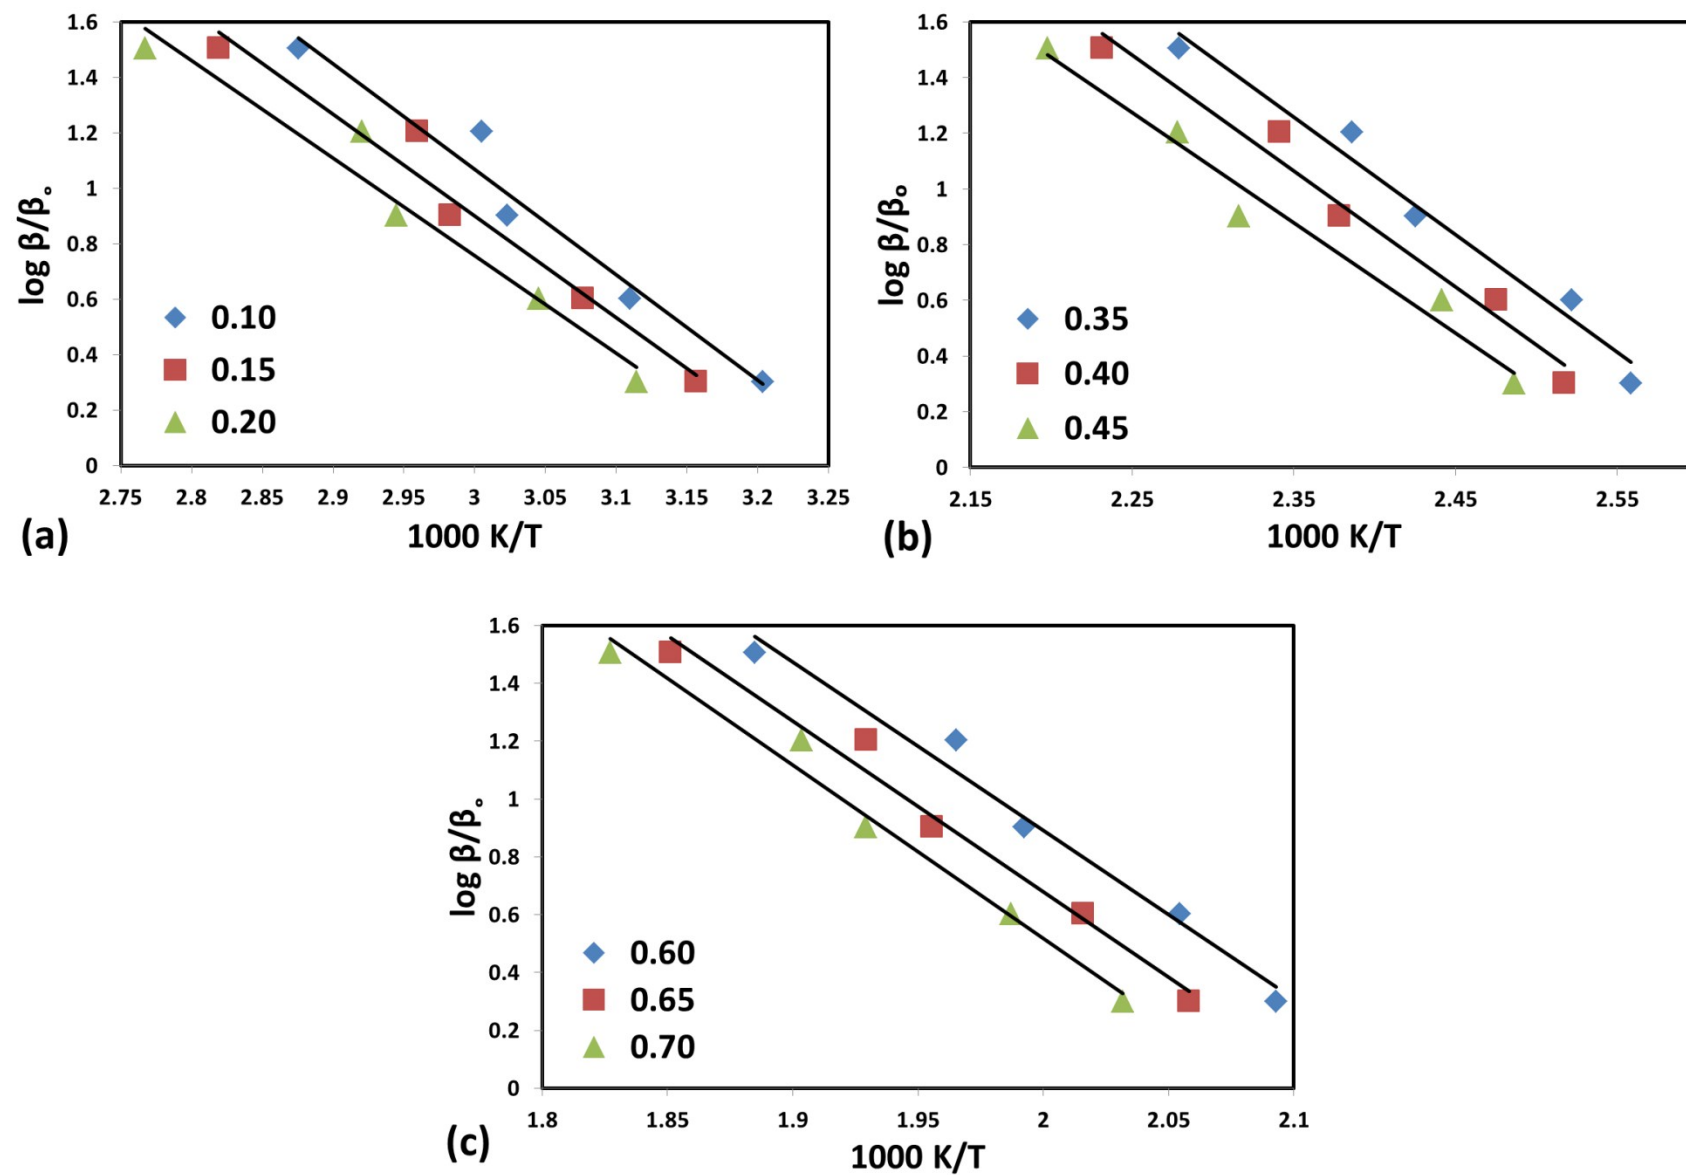

Figure S11: Activation energies for (a) Stage 1; (b) Stage 2 and (c) Stage 3 for H•IND
